# Supplementary material
Source: publisher figshare collection journal article supplement (https://gsajournals.figshare.com/ndownloader/files/13297316)
Supplement: Supplementary file 1 [file 13297316]

## Sheet: Sheet1
Table S1. Mapping rates of RNA-seq results of ovine fetuses and of datasets PRJNA254105 and PRJEB6169
Fetus ID	Input reads	% Mapped Reads	Number of Mapped Reads	Sex	Tissue type	Age
Brain_Con1	19338492	0.89	17261538	male	Brain	Day 135 fetuses
Brain_Con2	7403965	0.9	6629510	male
Brain_Con3	16659394	0.9	15055094	male
Brain_Con4	10877799	0.91	9932518	male
Brain_Con5	44248481	0.9	40040450	female
Brain_Con6	27184026	0.9	24500963	female
Brain_Con7	22361399	0.9	20089481	female
Brain_Over1	24241471	0.91	14836023	male
Brain_Over2	12234121	0.91	14979444	female
Brain_Over3	13845220	0.91	10926581	female
Brain_Over4	30882144	0.91	17921173	female
Brain_Res1	16265786	0.9	21904593	male
Brain_Res2	16451888	0.91	11086560	female
Brain_Res3	12068236	0.91	12564537	male
Brain_Res4	19787096	0.91	27966870	male
Kidney_Con1	5309507	0.9	16897583	male	Kidney
Kidney_Con2	19799155	0.9	20199107	male
Kidney_Con3	22380911	0.9	18491810	male
Kidney_Con4	26838096	0.9	23499521	male
Kidney_Con5	27727956	0.9	26421784	female
Kidney_Con6	19647949	0.89	29926965	female
Kidney_Con7	22924014	0.9	24366852	female
Kidney_Over1	8348235	0.9	25508281	male
Kidney_Over2	23979270	0.9	33525561	female
Kidney_Over3	7705718	0.9	13539473	female
Kidney_Over4	19777286	0.9	13964369	female
Kidney_Res1	22860452	0.89	60526905	male
Kidney_Res2	20851640	0.91	22129781	female
Kidney_Res3	26710129	0.91	14345916	male
Kidney_Res4	5475073	0.9	30242283	male
Lung_Con1	18685815	0.91	4836961	male	Lung
Lung_Con2	22413568	0.9	17858838	male
Lung_Con3	20516820	0.91	20386772	male
Lung_Con4	26061352	0.9	24242852	male
Lung_Con5	29341237	0.91	25146483	female
Lung_Con6	33475352	0.9	17692978	female
Lung_Con7	27083308	0.9	20656829	female
Lung_Over1	67688330	0.91	7591885	male
Lung_Over2	24310426	0.91	21765983	female
Lung_Over3	15834344	0.91	7026844	female
Lung_Over4	33703648	0.91	17920199	female
Lung_Res1	28273422	0.91	20732144	male
Lung_Res2	37304508	0.9	18835286	female
Lung_Res3	14983923	0.9	24124589	male
Lung_Res4	15457570	0.91	4992172	male
Average	2.19849e+07	0.903556	1.98465e+07
Online datasets
ERR489050	20073365	0.733	1.47138e+07	female	Hypothalamus	juvenile, 6-10 months
ERR489051	20126056	0.733	1.47524e+07	female	Hypothalamus	juvenile, 6-10 months
ERR489064	6049557	0.7246	4.38351e+06	female	Cerebrum	juvenile, 6-10 months
ERR489065	11668582	0.7777	9.07466e+06	female	Cerebrum	juvenile, 6-10 months
ERR489066	12035253	0.7775	9.35741e+06	female	Cerebrum	juvenile, 6-10 months
ERR489067	6157687	0.7238	4.45693e+06	female	Cerebrum	juvenile, 6-10 months
ERR489068	11672531	0.7779	9.08006e+06	female	Cerebrum	juvenile, 6-10 months
ERR489069	12133229	0.7792	9.45421e+06	female	Cerebrum	juvenile, 6-10 months
ERR489072	20128377	0.5013	1.00904e+07	female	Ovarian follicles	juvenile, 6-10 months
ERR489073	20057366	0.5017	1.00628e+07	female	Ovarian follicles	juvenile, 6-10 months
ERR489074	17029512	0.7589	1.29237e+07	female	Ovary	juvenile, 6-10 months
ERR489075	16983307	0.7594	1.28971e+07	female	Ovary	juvenile, 6-10 months
ERR489098	24316172	0.7812	1.89958e+07	female	Uterus	juvenile, 6-10 months
ERR489099	24241690	0.7819	1.89546e+07	female	Uterus	juvenile, 6-10 months
ERR489100	19941457	0.8142	1.62363e+07	female	Cervix	juvenile, 6-10 months
ERR489101	19901015	0.8145	1.62094e+07	female	Cervix	juvenile, 6-10 months
ERR489136	9405901	0.8415	7.91507e+06	female	Corpus luteum	adult
ERR489137	4237804	0.8444	3.5784e+06	female	Corpus luteum	adult
ERR489138	9401180	0.8418	7.91391e+06	female	Corpus luteum	adult
ERR489139	4114399	0.8449	3.47626e+06	female	Corpus luteum	adult
ERR489140	13565934	0.7606	1.03182e+07	female	Ovary	adult
ERR489141	13532747	0.7608	1.02957e+07	female	Ovary	adult
ERR489142	16898807	0.7894	1.33399e+07	female	Pituitary	adult
ERR489143	17097537	0.7894	1.34968e+07	female	Pituitary	adult
ERR489144	8777856	0.8342	7.32249e+06	female	Placenta + membranes	adult
ERR489145	8790101	0.8345	7.33534e+06	female	Placenta + membranes	adult
ERR489146	10640025	0.4849	5.15935e+06	female	Cervix	adult
ERR489147	10584551	0.485	5.13351e+06	female	Cervix	adult
ERR489148	11570223	0.565	6.53718e+06	female	Cerebellum	adult
ERR489149	4647539	0.5794	2.69278e+06	female	Cerebellum	adult
ERR489150	11958700	0.5664	6.77341e+06	female	Cerebellum	adult
ERR489151	4731346	0.5779	2.73424e+06	female	Cerebellum	adult
ERR489160	9944904	0.7441	7.4e+06	female	Rumen	adult
ERR489161	17379640	0.793	1.37821e+07	female	Rumen	adult
ERR489162	17749524	0.7934	1.40825e+07	female	Rumen	adult
ERR489163	10103380	0.7417	7.49368e+06	female	Rumen	adult
ERR489164	17410225	0.7938	1.38202e+07	female	Rumen	adult
ERR489165	17959302	0.7951	1.42794e+07	female	Rumen	adult
ERR489180	22301033	0.7759	1.73034e+07	female	Uterus	adult
ERR489181	22275909	0.7762	1.72906e+07	female	Uterus	adult
ERR489190	24952685	0.8258	2.06059e+07	female	Muscle biceps	adult
ERR489191	25246533	0.8257	2.08461e+07	female	Muscle biceps	adult
ERR489198	19670353	0.7675	1.5097e+07	male	Hypothallamus	adult
ERR489199	20344065	0.7685	1.56344e+07	male	Hypothallamus	adult
ERR489200	23921437	0.8166	1.95342e+07	male	Pituitary gland	adult
ERR489201	23915951	0.8174	1.95489e+07	male	Pituitary gland	adult
ERR489204	30429767	0.8021	2.44077e+07	male	Rumen	adult
ERR489205	30302309	0.8028	2.43267e+07	male	Rumen	adult
ERR489216	20192461	0.7776	1.57017e+07	male	Brain cerebellum	adult
ERR489217	20301464	0.7782	1.57986e+07	male	Brain cerebellum	adult
ERR489218	21452331	0.7542	1.61793e+07	male	Brain cerebrum	adult
ERR489219	21529168	0.7551	1.62567e+07	male	Brain cerebrum	adult
ERR489222	27191694	0.7582	2.06167e+07	male	Testes	adult
ERR489223	27664332	0.7612	2.10581e+07	male	Testes	adult
ERR489224	16645109	0.7948	1.32295e+07	male	Testes epididymis	adult
ERR489225	4902327	0.8024	3.93363e+06	male	Testes epididymis	adult
ERR489226	17148600	0.7959	1.36486e+07	male	Testes epididymis	adult
ERR489227	4986046	0.8018	3.99781e+06	male	Testes epididymis	adult
ERR489246	17512426	0.7635	1.33707e+07	male	Muscle biceps	adult
ERR489247	17481574	0.7635	1.33472e+07	male	Muscle biceps	adult
ERR489258	33414452	0.7621	2.54652e+07	male	Ventricle	adult
ERR489259	33347766	0.7625	2.54277e+07	male	Ventricle	adult
ERR489264	18179829	0.722	1.31258e+07	male	Liver	adult
ERR489265	18454053	0.7234	1.33497e+07	male	Liver	adult
ERR489268	18910164	0.7317	1.38366e+07	female	Heart vertricle	adult
ERR489269	18891467	0.7315	1.38191e+07	female	Heart vertricle	adult
ERR489272	23024258	0.5921	1.36327e+07	female	Liver	adult
ERR489273	23267324	0.5935	1.38092e+07	female	Liver	adult
ERR489276	28618271	0.6667	1.90798e+07	female	Ventricle	juvenile, 6-10 months
ERR489277	28969609	0.6677	1.9343e+07	female	Ventricle	juvenile, 6-10 months
SRR1503877	9806286	0.898	8.80604e+06	day 14	embryo	embryo
SRR1503878	14413024	0.8872	1.27872e+07	day 14	embryo	embryo
SRR1503879	14528978	0.8414	1.22247e+07	day 14	embryo	embryo
SRR1503880	10189749	0.8116	8.27e+06	day 14	embryo	embryo
Average	1.7127e+07	0.749693	1.28545e+07
